# Supplementary material for: Genome-scale CRISPR/Cas9 screen determines factors modulating sensitivity to ProTide NUC-1031
Source: PubMed Central journal article supplement (PMC6529431; doi:10.1038/s41598-019-44089-3), 2019-05-21
Supplement: 41598_2019_44089_MOESM1_ESM.pdf [file 41598_2019_44089_MOESM1_ESM.pdf]

Genome-scale CRISPR/Cas9 screen determines factors modulating sensitivity to ProTide

NUC-1031

Awa Sarr<sup>1,2</sup>§, Jennifer Bré<sup>1</sup>§, In Hwa Um<sup>1</sup>, Tsz Huen Chan<sup>1</sup>, Peter Mullen<sup>1</sup>, David J.

Harrison<sup>1</sup>, Paul A. Reynolds<sup>1,2\*</sup>

<sup>1</sup>*School of Medicine, University of St Andrews, St Andrews, UK, KY16 9TF.*

<sup>2</sup>*Biomedical Sciences Research Complex, University of St. Andrews, St. Andrews, UK.*

§The authors contributed equally to this work

\*Corresponding author

Email: [par10@st-andrews.ac.uk](mailto:par10@st-andrews.ac.uk)

## Supplementary Information

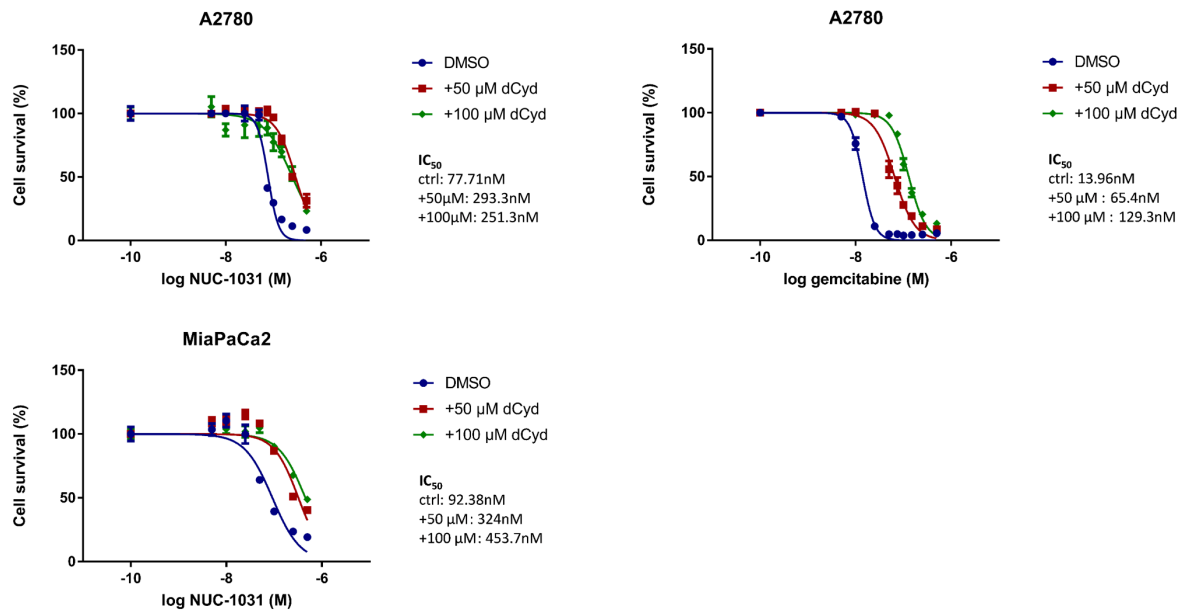

**Figure S1:** Dose-response curves for A2780 or MiaPaCa2 cells 4d after treatment with NUC-1031 or gemcitabine that were pre-treated when cells were plated with either DMSO, 50  $\mu$ M or 100  $\mu$ M of deoxycytidine (dCyd). Values represent mean  $\pm$  SEM (n=6).

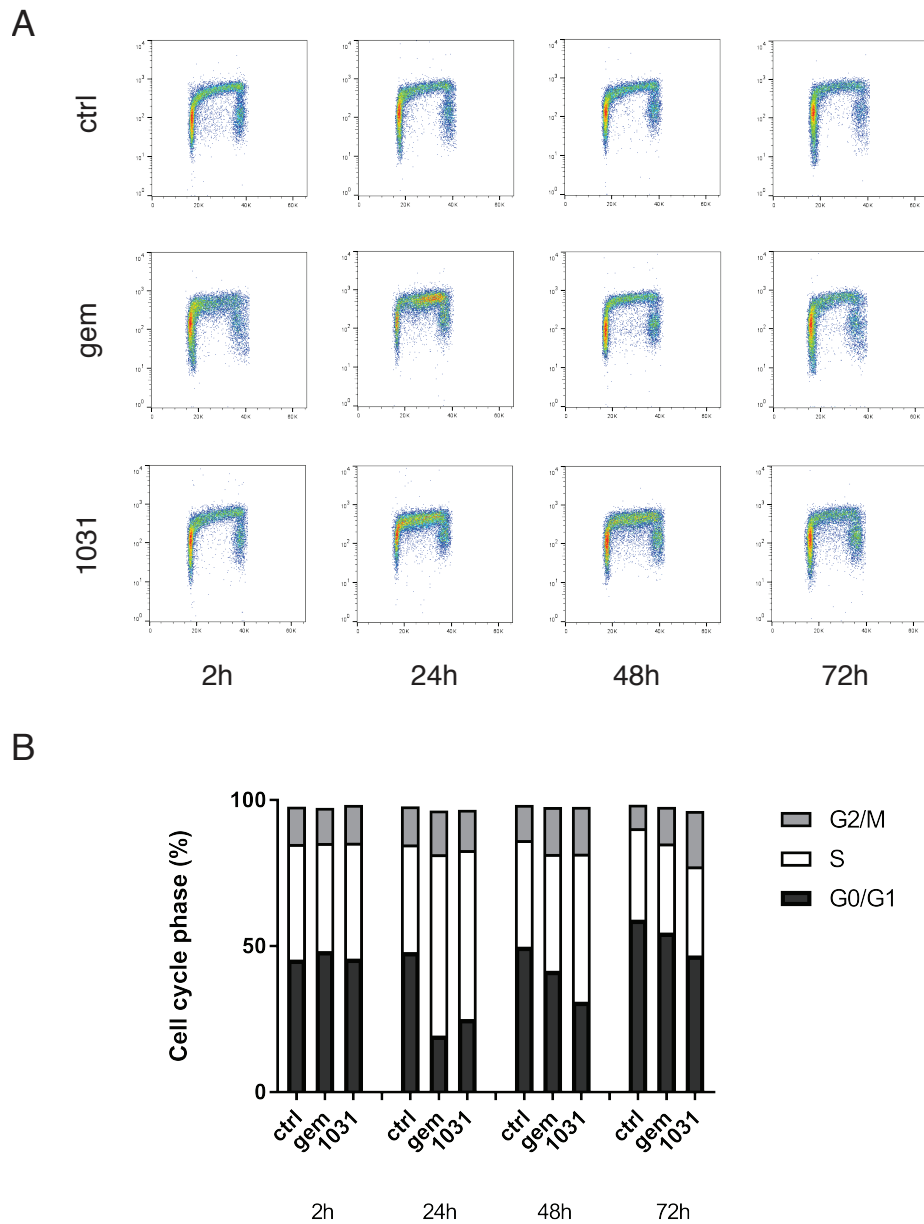

**Figure S2:** (A) Cell cycle analysis of A2780 cells, post treatment with IC<sub>50</sub> of gemcitabine or NUC-1031 or DMSO (ctrl) for 2h. Horizontal axis, DNA content; vertical axis, BrdU incorporation. (B) Quantification of percentage of cell population in different phases of the cell cycle.

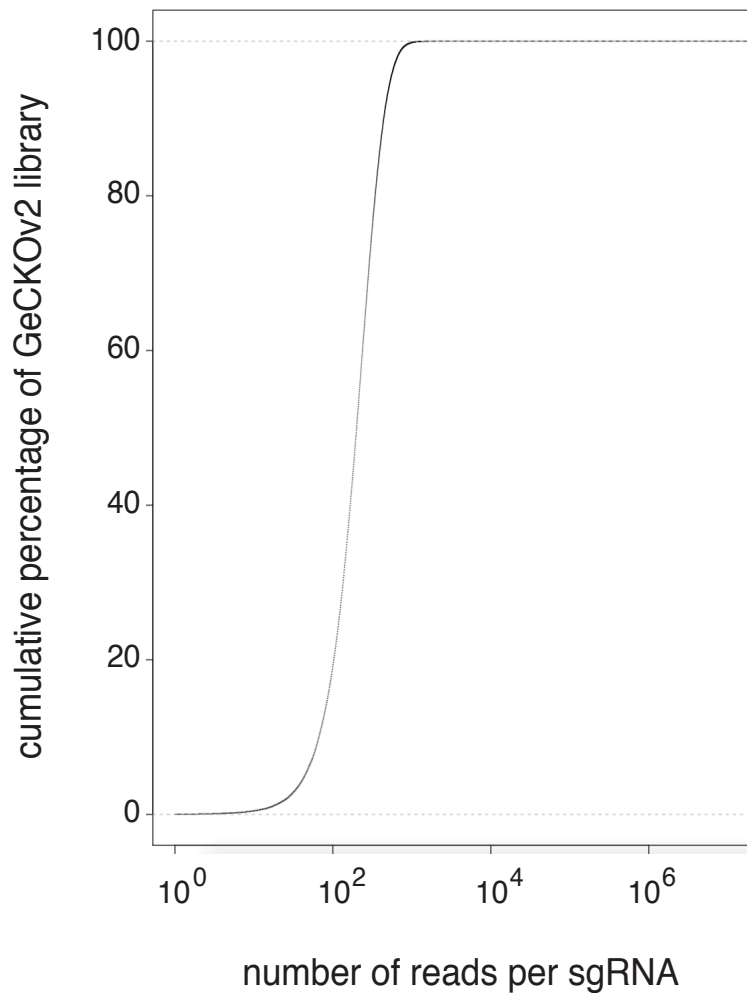

**Fig. S3: Read coverage per sgRNA for GeCKOv2 library**

Cumulative distribution of the number of reads per sgRNA in a single MiaPaCa2 experiment. Less than 1% of the sgRNAs are covered by less than 10 reads.



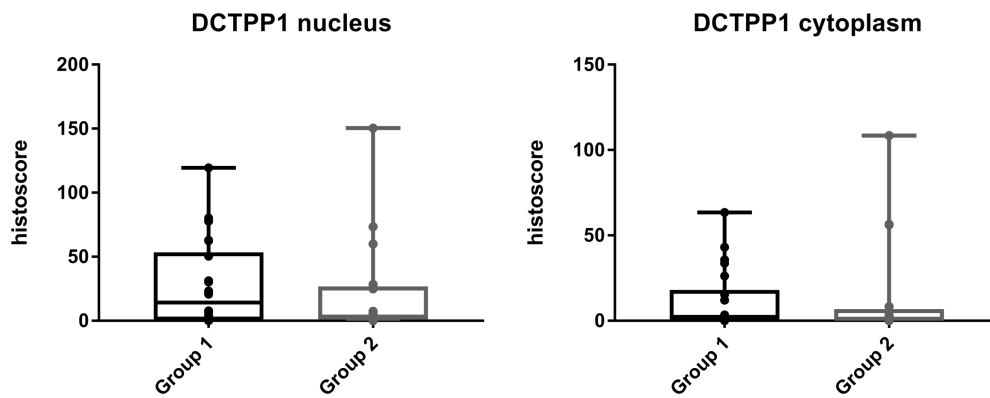

**Figure S5:** Patients were stable for less than six months, or progressive disease developed within that time (group 1), or were stable for six months or more (group 2). Tissues were immunostained for DCTPP1 and scanned images were quantified using QuPath. Histoscores for DCTPP1 expression (nucleus or cytoplasm) for group 1 vs group 2 are presented (nucleus group 1 vs group 2  $p=0.7054$ , cytoplasm group 1 vs group 2  $p=0.6679$ ; Mann Whitney test).

MAGeCK analysis: gene ranking  
 Top 30 hits Acelarin d14

| id                                    | num | neg score | neg p-value | neg fdr  | neg rank | neg goodsigma | pos score  | pos p-value | pos fdr  | pos rank | pos goodsigma |
|---------------------------------------|-----|-----------|-------------|----------|----------|---------------|------------|-------------|----------|----------|---------------|
| TMEM165                               | 6   | 0.89556   | 0.7684      | 0.870669 | 19323    | 0             | 1.70E-16   | 2.26E-07    | 0.002475 | 1        | 5             |
| DCK                                   | 6   | 0.56879   | 0.27278     | 0.492317 | 12114    | 0             | 1.21E-10   | 2.26E-07    | 0.002475 | 2        | 4             |
| PVCR2                                 | 6   | 0.99302   | 0.98538     | 0.995277 | 21697    | 0             | 8.59E-06   | 7.00E-06    | 0.051155 | 3        | 2             |
| DCTP1                                 | 6   | 0.9554    | 0.89913     | 0.950441 | 20729    | 0             | 2.43E-05   | 3.23E-05    | 0.149615 | 4        | 5             |
| SYNCRIP                               | 6   | 0.12341   | 0.033067    | 0.169749 | 4155     | 2             | 3.03E-05   | 4.22E-05    | 0.149615 | 5        | 3             |
| NonTargetingControlGuideForHuman_0731 | 2   | 0.99997   | 0.99998     | 0.999985 | 21915    | 0             | 3.17E-05   | 4.36E-05    | 0.149615 | 6        | 2             |
| RASSF7                                | 6   | 0.38171   | 0.1424      | 0.373018 | 8351     | 1             | 3.45E-05   | 4.99E-05    | 0.149615 | 7        | 3             |
| NACC2                                 | 6   | 0.39357   | 0.15247     | 0.388383 | 8564     | 1             | 4.04E-05   | 5.62E-05    | 0.149615 | 8        | 3             |
| NonTargetingControlGuideForHuman_0040 | 2   | 0.99996   | 0.99998     | 0.999985 | 21914    | 0             | 4.31E-05   | 6.14E-05    | 0.149615 | 9        | 2             |
| COQ4                                  | 6   | 0.72927   | 0.48821     | 0.681733 | 15613    | 0             | 6.44E-05   | 0.00010233  | 0.168542 | 10       | 2             |
| NonTargetingControlGuideForHuman_0737 | 2   | 0.99994   | 0.99996     | 0.999985 | 21913    | 0             | 6.48E-05   | 0.00010233  | 0.168542 | 11       | 2             |
| LOC100288524                          | 6   | 0.037069  | 0.0037808   | 0.047873 | 1723     | 2             | 6.70E-05   | 0.00011814  | 0.168542 | 12       | 3             |
| TSPAN12                               | 6   | 0.061216  | 0.011213    | 0.100332 | 2439     | 1             | 8.26E-05   | 0.00014435  | 0.168542 | 13       | 2             |
| DCAF4                                 | 6   | 0.99166   | 0.98144     | 0.992835 | 21663    | 0             | 9.36E-05   | 0.000157    | 0.168542 | 14       | 5             |
| NonTargetingControlGuideForHuman_0075 | 2   | 0.99991   | 0.99992     | 0.999985 | 21912    | 0             | 9.46E-05   | 0.00015926  | 0.168542 | 15       | 2             |
| CASA                                  | 6   | 0.80952   | 0.60412     | 0.759572 | 17409    | 0             | 9.48E-05   | 0.00015926  | 0.168542 | 16       | 4             |
| MB                                    | 6   | 0.31836   | 0.095462    | 0.284932 | 7323     | 1             | 0.00010169 | 0.00017055  | 0.168542 | 17       | 5             |
| NonTargetingControlGuideForHuman_0341 | 2   | 0.99989   | 0.9999      | 0.999985 | 21911    | 0             | 0.00010952 | 0.00017552  | 0.168542 | 18       | 2             |
| ING3                                  | 6   | 0.99466   | 0.98926     | 0.99745  | 21735    | 0             | 0.00012134 | 0.00019314  | 0.168542 | 19       | 4             |
| PTOV1                                 | 6   | 0.016441  | 0.0015544   | 0.035042 | 933      | 1             | 0.00012154 | 0.00019314  | 0.168542 | 20       | 4             |
| SKOR1                                 | 6   | 0.057705  | 0.0084781   | 0.079033 | 2333     | 1             | 0.00013155 | 0.00020489  | 0.168542 | 21       | 4             |
| NonTargetingControlGuideForHuman_0124 | 2   | 0.99987   | 0.99987     | 0.999985 | 21910    | 0             | 0.0001338  | 0.0002076   | 0.168542 | 22       | 2             |
| ZNF583                                | 6   | 0.35839   | 0.1198      | 0.329225 | 7963     | 1             | 0.00013629 | 0.00020805  | 0.168542 | 23       | 3             |
| COB37A                                | 6   | 0.98104   | 0.95755     | 0.980509 | 21394    | 0             | 0.00013741 | 0.0002094   | 0.168542 | 24       | 4             |
| POLA2                                 | 6   | 0.80588   | 0.5957      | 0.75335  | 17326    | 0             | 0.00013826 | 0.00021121  | 0.168542 | 25       | 4             |
| ATXN2L                                | 6   | 0.90774   | 0.79438     | 0.886342 | 19634    | 0             | 0.00014903 | 0.00021889  | 0.168542 | 26       | 4             |
| ITIH4                                 | 6   | 0.34886   | 0.11698     | 0.326132 | 7792     | 1             | 0.00015444 | 0.00022612  | 0.168542 | 27       | 3             |
| NonTargetingControlGuideForHuman_0397 | 2   | 0.99984   | 0.99984     | 0.999985 | 21907    | 0             | 0.00015521 | 0.00022657  | 0.168542 | 28       | 2             |
| VPS54                                 | 6   | 0.40552   | 0.15962     | 0.396167 | 8781     | 1             | 0.0001669  | 0.0002469   | 0.168542 | 29       | 3             |

MAGeCK analysis: gene ranking  
 Top 30 hits Acelarin d21

| id                                    | num | neg score | neg p-value | neg fdr  | neg rank | neg goodsigma | pos score  | pos p-value | pos fdr  | pos rank | pos goodsigma |
|---------------------------------------|-----|-----------|-------------|----------|----------|---------------|------------|-------------|----------|----------|---------------|
| TMEM165                               | 6   | 0.98768   | 0.927       | 0.942479 | 21555    | 0             | 2.18E-12   | 2.26E-07    | 0.00495  | 1        | 5             |
| DCK                                   | 6   | 0.76661   | 0.38221     | 0.50634  | 16535    | 0             | 2.80E-07   | 2.48E-06    | 0.027228 | 2        | 5             |
| NonTargetingControlGuideForHuman_0397 | 2   | 1         | 0.99997     | 0.999974 | 21915    | 0             | 3.70E-06   | 4.27E-05    | 0.311881 | 3        | 2             |
| SIRPD                                 | 6   | 0.99413   | 0.96151     | 0.970096 | 21721    | 0             | 9.06E-06   | 0.00012808  | 0.589109 | 4        | 5             |
| TPSAIN12                              | 6   | 0.015437  | 0.00040955  | 0.009497 | 900      | 2             | 9.73E-06   | 0.00013441  | 0.589109 | 5        | 2             |
| HCN3                                  | 6   | 0.51095   | 0.16972     | 0.33742  | 10998    | 1             | 1.50E-05   | 0.00019224  | 0.702145 | 6        | 5             |
| POMP                                  | 6   | 0.6116    | 0.23302     | 0.388634 | 13124    | 0             | 1.92E-05   | 0.0002582   | 0.808345 | 7        | 4             |
| NonTargetingControlGuideForHuman_0203 | 2   | 0.99996   | 0.99972     | 0.999764 | 21914    | 0             | 3.58E-05   | 0.00049313  |          | 8        | 2             |
| NonTargetingControlGuideForHuman_0045 | 2   | 0.99996   | 0.99971     | 0.999764 | 21913    | 0             | 3.82E-05   | 0.00051075  |          | 9        | 2             |
| DDO                                   | 6   | 0.26344   | 0.052691    | 0.168552 | 6785     | 1             | 6.27E-05   | 0.00074478  |          | 10       | 5             |
| SLC36A1                               | 6   | 0.93076   | 0.7074      | 0.76749  | 20198    | 0             | 6.34E-05   | 0.00076511  |          | 11       | 3             |
| NonTargetingControlGuideForHuman_0005 | 2   | 0.99993   | 0.99953     | 0.999669 | 21912    | 0             | 7.03E-05   | 0.00087399  |          | 12       | 2             |
| ADORA1                                | 6   | 0.012939  | 0.00030338  | 0.008504 | 780      | 2             | 7.29E-05   | 0.00090607  |          | 13       | 3             |
| MEMO1                                 | 6   | 0.7397    | 0.34785     | 0.477227 | 15957    | 0             | 8.26E-05   | 0.0010624   |          | 14       | 2             |
| NonTargetingControlGuideForHuman_0731 | 2   | 0.99991   | 0.99934     | 0.999519 | 21911    | 0             | 9.17E-05   | 0.0012232   |          | 15       | 2             |
| GLDC                                  | 6   | 0.54405   | 0.1885      | 0.348123 | 11662    | 1             | 0.0001866  | 0.0015476   |          | 16       | 4             |
| WFDG9                                 | 6   | 0.93738   | 0.73245     | 0.788294 | 20355    | 0             | 0.00012154 | 0.0016072   |          | 17       | 2             |
| NonTargetingControlGuideForHuman_0476 | 2   | 0.99987   | 0.99905     | 0.999283 | 21910    | 0             | 0.00013305 | 0.001834    |          | 18       | 2             |
| NonTargetingControlGuideForHuman_0075 | 2   | 0.99986   | 0.99898     | 0.999249 | 21909    | 0             | 0.0001414  | 0.0019755   |          | 19       | 2             |
| ZNF565                                | 6   | 0.93562   | 0.72376     | 0.780403 | 20319    | 0             | 0.00014291 | 0.0020021   |          | 20       | 2             |
| C7orf49                               | 6   | 0.45745   | 0.13385     | 0.294779 | 9951     | 1             | 0.00014365 | 0.0020252   |          | 21       | 2             |
| THAP5                                 | 6   | 0.99985   | 0.99887     | 0.999193 | 21908    | 0             | 0.00015071 | 0.0021508   |          | 22       | 6             |
| EP515L1                               | 6   | 0.16916   | 0.025647    | 0.101609 | 5454     | 1             | 0.00015274 | 0.0021625   |          | 23       | 3             |
| NonTargetingControlGuideForHuman_0341 | 2   | 0.99984   | 0.99884     | 0.999193 | 21907    | 0             | 0.00015887 | 0.0022529   |          | 24       | 2             |
| KIAA2018                              | 6   | 0.20367   | 0.027633    | 0.101609 | 5952     | 1             | 0.0001589  | 0.0022529   |          | 25       | 3             |
| NonTargetingControlGuideForHuman_0058 | 2   | 0.99984   | 0.99882     | 0.999193 | 21906    | 0             | 0.00016277 | 0.0023199   |          | 26       | 2             |
| PORCN                                 | 6   | 0.2978    | 0.063158    | 0.186469 | 7296     | 1             | 0.0001669  | 0.0023807   |          | 27       | 2             |
| CMA1                                  | 6   | 0.73834   | 0.34774     | 0.477227 | 15930    | 0             | 0.00017015 | 0.00248     |          | 28       | 2             |
| NonTargetingControlGuideForHuman_0870 | 2   | 0.99982   | 0.99866     | 0.999118 | 21905    | 0             | 0.00018104 | 0.0026527   |          | 29       | 2             |



MAGeCK analysis: gene ranking  
 Top 30 hits Gemcitabine d14

| id             | num | neg score | neg p-value | neg fdr  | neg rank | neg goodsgrna | pos score  | pos p-value | pos fdr | pos rank | pos goodsgrna |
|----------------|-----|-----------|-------------|----------|----------|---------------|------------|-------------|---------|----------|---------------|
| PPP1R32        | 6   | 0.034286  | 0.0026653   | 0.042143 | 1269     | 1             | 3.39E-06   | 2.26E-07    | 0.00015 | 1        | 3             |
| hsa-mir-4711   | 4   | 0.92423   | 0.87125     | 0.945311 | 20198    | 0             | 6.34E-06   | 2.26E-07    | 0.00015 | 2        | 3             |
| NCOA3          | 6   | 0.98785   | 0.98645     | 0.999362 | 21631    | 0             | 8.47E-06   | 2.26E-07    | 0.00015 | 3        | 4             |
| CENPE          | 6   | 0.91379   | 0.85747     | 0.941615 | 19944    | 0             | 1.52E-05   | 2.26E-07    | 0.00015 | 4        | 4             |
| UGGT2          | 6   | 0.98817   | 0.98678     | 0.999369 | 21638    | 0             | 1.61E-05   | 2.26E-07    | 0.00015 | 5        | 3             |
| ARL1           | 6   | 0.44975   | 0.22345     | 0.50741  | 9644     | 0             | 2.43E-05   | 2.26E-07    | 0.00015 | 6        | 1             |
| hsa-mir-548h-5 | 3   | 0.99888   | 0.99966     | 0.999991 | 21887    | 0             | 3.94E-05   | 2.26E-07    | 0.00015 | 7        | 2             |
| UBXN2A         | 6   | 0.87911   | 0.79828     | 0.910972 | 19200    | 0             | 5.76E-05   | 2.26E-07    | 0.00015 | 8        | 2             |
| NADK2          | 6   | 0.092507  | 0.01462     | 0.139671 | 2260     | 1             | 7.11E-05   | 2.26E-07    | 0.00015 | 9        | 2             |
| CLEC19A        | 6   | 0.41226   | 0.18752     | 0.4618   | 8836     | 0             | 7.29E-05   | 2.26E-07    | 0.00015 | 10       | 1             |
| PKP4           | 6   | 0.9855    | 0.98288     | 0.99886  | 21557    | 0             | 7.36E-05   | 2.26E-07    | 0.00015 | 11       | 4             |
| BGLAP          | 6   | 0.27199   | 0.084905    | 0.311325 | 5808     | 0             | 9.25E-05   | 2.26E-07    | 0.00015 | 12       | 3             |
| SHF            | 6   | 0.68658   | 0.50439     | 0.74486  | 14810    | 0             | 0.00011002 | 2.26E-07    | 0.00015 | 13       | 4             |
| PDDC1          | 6   | 0.9164    | 0.86066     | 0.941615 | 20011    | 0             | 0.00012154 | 2.26E-07    | 0.00015 | 14       | 1             |
| LPPR1          | 6   | 0.7502    | 0.59838     | 0.806785 | 16252    | 0             | 0.00012822 | 2.26E-07    | 0.00015 | 15       | 4             |
| LRRC16B        | 6   | 0.83209   | 0.72435     | 0.874568 | 18145    | 0             | 0.00012888 | 2.26E-07    | 0.00015 | 16       | 3             |
| MILR1          | 6   | 0.16825   | 0.03779     | 0.218891 | 3695     | 1             | 0.00013419 | 2.26E-07    | 0.00015 | 17       | 3             |
| PTOV1          | 6   | 0.18487   | 0.044805    | 0.225685 | 4019     | 1             | 0.00017015 | 2.26E-07    | 0.00015 | 18       | 1             |
| TUBA1B         | 6   | 0.25114   | 0.068054    | 0.274839 | 5375     | 1             | 0.0001829  | 2.26E-07    | 0.00015 | 19       | 3             |
| hsa-mir-3143   | 4   | 0.99962   | 0.99992     | 0.999991 | 21907    | 0             | 0.00019384 | 2.26E-07    | 0.00015 | 20       | 3             |
| RBBP8          | 6   | 0.1964    | 0.045191    | 0.225685 | 4260     | 1             | 0.00020858 | 2.26E-07    | 0.00015 | 21       | 2             |
| C1orf141       | 6   | 0.23063   | 0.053314    | 0.232297 | 4945     | 1             | 0.00021876 | 2.26E-07    | 0.00015 | 22       | 1             |
| NOLC1          | 6   | 0.36999   | 0.1587      | 0.437027 | 7939     | 0             | 0.00026737 | 2.26E-07    | 0.00015 | 23       | 1             |
| FAM13A         | 6   | 0.99213   | 0.99272     | 0.999991 | 21737    | 0             | 0.00028476 | 2.26E-07    | 0.00015 | 24       | 3             |
| BYES           | 6   | 0.81611   | 0.70444     | 0.866016 | 17787    | 0             | 0.00031598 | 2.26E-07    | 0.00015 | 25       | 1             |
| PCDH18         | 6   | 0.87186   | 0.78798     | 0.906469 | 19036    | 0             | 0.00034594 | 2.26E-07    | 0.00015 | 26       | 3             |
| TMEM243        | 6   | 0.45067   | 0.22573     | 0.50904  | 9665     | 0             | 0.00036458 | 2.26E-07    | 0.00015 | 27       | 1             |
| TNFRSF25       | 6   | 0.1258    | 0.028319    | 0.20003  | 2880     | 1             | 0.00037039 | 2.26E-07    | 0.00015 | 28       | 3             |
| hsa-mir-3195   | 4   | 0.33703   | 0.12538     | 0.378989 | 7247     | 0             | 0.00037246 | 2.26E-07    | 0.00015 | 29       | 2             |

MAGeCK analysis: gene ranking  
 Top 30 hits Gemcitabine d21

| id                                    | num | neg score | neg p-value | neg fdr  | neg rank | neg goodsgma | pos score  | pos p-value | pos fdr  | pos rank | pos goodsgma |
|---------------------------------------|-----|-----------|-------------|----------|----------|--------------|------------|-------------|----------|----------|--------------|
| TSC2                                  | 6   | 0.93806   | 0.83211     | 0.895286 | 20360    | 0            | 6.01E-06   | 2.26E-07    | 0.00495  | 1        | 4            |
| CRYGC                                 | 6   | 0.93828   | 0.83225     | 0.895286 | 20372    | 0            | 1.97E-05   | 1.13E-06    | 0.008663 | 2        | 4            |
| ATRNL1                                | 6   | 0.043646  | 0.00055186  | 0.008446 | 1430     | 1            | 2.43E-05   | 1.58E-06    | 0.008663 | 3        | 1            |
| SH3BP4                                | 6   | 0.53277   | 0.21048     | 0.409668 | 11242    | 0            | 2.94E-05   | 1.58E-06    | 0.008663 | 4        | 4            |
| hsa-mir-6727                          | 4   | 0.6142    | 0.31463     | 0.529915 | 12973    | 0            | 4.86E-05   | 2.48E-06    | 0.010891 | 5        | 1            |
| MAPK5                                 | 6   | 0.98361   | 0.95938     | 0.978212 | 21493    | 0            | 7.11E-05   | 3.39E-06    | 0.011386 | 6        | 2            |
| hsa-mir-1254-2                        | 4   | 0.10667   | 0.0070364   | 0.060403 | 2481     | 1            | 0.00010817 | 4.29E-06    | 0.011386 | 7        | 2            |
| NonTargetingControlGuideForHuman_0555 | 2   | 0.99988   | 0.99996     | 0.99996  | 21911    | 0            | 0.00011641 | 4.74E-06    | 0.011386 | 8        | 2            |
| hsa-mir-1265                          | 4   | 0.99997   | 0.99999     | 1        | 21914    | 0            | 0.00011646 | 4.74E-06    | 0.011386 | 9        | 3            |
| CDH20                                 | 6   | 0.44623   | 0.14132     | 0.331057 | 9355     | 0            | 0.00011803 | 5.20E-06    | 0.011386 | 10       | 4            |
| LHX6                                  | 6   | 0.90563   | 0.75886     | 0.849053 | 19585    | 0            | 0.00012154 | 6.10E-06    | 0.012151 | 11       | 1            |
| OGN                                   | 6   | 0.24413   | 0.034297    | 0.144563 | 5108     | 1            | 0.00017015 | 1.20E-05    | 0.014407 | 12       | 1            |
| MOB1A                                 | 6   | 0.10432   | 0.0069876   | 0.060403 | 2442     | 1            | 0.00017699 | 1.20E-05    | 0.014407 | 13       | 3            |
| hsa-mir-3192                          | 4   | 0.76671   | 0.50427     | 0.675986 | 16342    | 0            | 0.00017825 | 1.20E-05    | 0.014407 | 14       | 1            |
| HFM1                                  | 6   | 0.96551   | 0.91266     | 0.95012  | 21051    | 0            | 0.00017962 | 1.20E-05    | 0.014407 | 15       | 3            |
| OR5R1                                 | 6   | 0.41494   | 0.11795     | 0.297278 | 8693     | 0            | 0.00018167 | 1.20E-05    | 0.014407 | 16       | 2            |
| FUT1                                  | 6   | 0.43605   | 0.13047     | 0.31136  | 9130     | 0            | 0.00020359 | 1.38E-05    | 0.014407 | 17       | 3            |
| IMPA1                                 | 6   | 0.23495   | 0.033543    | 0.144563 | 4919     | 1            | 0.00021765 | 1.47E-05    | 0.014407 | 18       | 2            |
| NOTUM                                 | 6   | 0.14073   | 0.015556    | 0.101451 | 3094     | 1            | 0.00021876 | 1.47E-05    | 0.014407 | 19       | 1            |
| GPX3                                  | 6   | 0.96943   | 0.92281     | 0.956463 | 21144    | 0            | 0.00026082 | 1.97E-05    | 0.014407 | 20       | 2            |
| TRIM21                                | 6   | 0.84442   | 0.62597     | 0.75589  | 18146    | 0            | 0.00026283 | 1.97E-05    | 0.014407 | 21       | 3            |
| NUM1                                  | 6   | 0.14411   | 0.015614    | 0.101451 | 3156     | 1            | 0.00027401 | 2.01E-05    | 0.014407 | 22       | 2            |
| SOC2                                  | 6   | 0.14287   | 0.015562    | 0.101451 | 3136     | 1            | 0.00029533 | 2.10E-05    | 0.014407 | 23       | 4            |
| HMGCS2                                | 6   | 0.80267   | 0.55789     | 0.711814 | 17170    | 0            | 0.00030053 | 2.46E-05    | 0.014407 | 24       | 4            |
| LRCH2                                 | 6   | 0.46042   | 0.15653     | 0.352398 | 9663     | 0            | 0.00030157 | 2.46E-05    | 0.014407 | 25       | 3            |
| NonTargetingControlGuideForHuman_0150 | 2   | 0.99969   | 0.99984     | 1        | 21909    | 0            | 0.00030506 | 2.51E-05    | 0.014407 | 26       | 2            |
| hsa-mir-145                           | 4   | 0.94144   | 0.84493     | 0.905851 | 20441    | 0            | 0.00031241 | 2.51E-05    | 0.014407 | 27       | 3            |
| BCOR                                  | 6   | 0.28064   | 0.046821    | 0.173201 | 5871     | 0            | 0.00031598 | 2.51E-05    | 0.014407 | 28       | 1            |
| hsa-mir-4529                          | 4   | 0.79585   | 0.54835     | 0.705037 | 17010    | 0            | 0.000321   | 2.55E-05    | 0.014407 | 29       | 3            |

Table S1: MAGeCK analysis gene ranking for NUC-1031 and gemcitabine at d14 and d21.

| Primers PCR#1         | Primer Sequences                                     | Purification                                  | Synthesis scale (μM) |
|-----------------------|------------------------------------------------------|-----------------------------------------------|----------------------|
| v2Adaptor_F (Forward) | 5'- AATGGACTATCATATGCTTACCGTAACTTGAAAGTATTTTCG -3'   | HPLC (High performance Liquid chromatography) | 0.05                 |
| v2Adaptor_R (Reverse) | 5'- TCTACTATTCTTTCCCTGCACTGTTGTGGGCGATGTGCGCTCTG -3' | HPLC                                          | 0.05                 |

| Primers PCR2 | Primer Sequences                                                                                      | Purification | Synthesis scale (μM) |
|--------------|-------------------------------------------------------------------------------------------------------|--------------|----------------------|
| Illumina F1  | 5'-AATGATACGGCGACCACCGAGATCTACACTCTTTCCCTACACGACGCTCTTCCGATCTTAAGTAGAGTCTTGTGGAAAGGACGAAACACCG-3'     | HPLC         | 0.05                 |
| Illumina F2  | 5'-AATGATACGGCGACCACCGAGATCTACACTCTTTCCCTACACGACGCTCTTCCGATCTATACACGATCTTGTGGAAAGGACGAAACACCG-3'      | HPLC         | 0.05                 |
| Illumina F3  | 5'-AATGATACGGCGACCACCGAGATCTACACTCTTTCCCTACACGACGCTCTTCCGATCTGATCGCGCGTCTTGTGGAAAGGACGAAACACCG-3'     | HPLC         | 0.05                 |
| Illumina F4  | 5'-AATGATACGGCGACCACCGAGATCTACACTCTTTCCCTACACGACGCTCTTCCGATCTCGATCATGATCGTCTTGTGGAAAGGACGAAACACCG-3'  | HPLC         | 0.05                 |
| Illumina R1  | 5'-CAAGCAGAAGACGGCATAACGAGATAAGTAGAGGTGACTGGAGTTCA GACGTGTGCTCTCCGATCTTTCTACTATTCTTTCCCTGCACTGT-3'    | HPLC         | 0.05                 |
| Illumina R2  | 5'-CAAGCAGAAGACGGCATAACGAGATACACGATCGTGACTGGAGTTCA GACGTGTGCTCTCCGATCTATTCTACTATTCTTTCCCTGCACTGT-3'   | HPLC         | 0.05                 |
| Illumina R3  | 5'-CAAGCAGAAGACGGCATAACGAGATCGCGCGTGTGACTGGAGTTCA GACGTGTGCTCTCCGATCTGATTCTACTATTCTTTCCCTGCACTGT-3'   | HPLC         | 0.05                 |
| Illumina R4  | 5'-CAAGCAGAAGACGGCATAACGAGATCATGATCGGTGACTGGAGTTCA GACGTGTGCTCTCCGATCTCGATTCTACTATTCTTTCCCTGCACTGT-3' | HPLC         | 0.05                 |

|    | Sample                          | Forward primer | Reverse primer |
|----|---------------------------------|----------------|----------------|
| 1  | Replicate 1: Baseline           | Illumina F1    | Illumina R1    |
| 2  | Replicate 1: Day 14 Control     | Illumina F1    | Illumina R2    |
| 3  | Replicate 1: Day 14 Gemcitabine | Illumina F1    | Illumina R3    |
| 4  | Replicate 1: Day 14 Acelarin    | Illumina F1    | Illumina R4    |
| 5  | Replicate 1: Day 21 Control     | Illumina F2    | Illumina R1    |
| 6  | Replicate 1: Day 21 Gemcitabine | Illumina F2    | Illumina R2    |
| 7  | Replicate 1: Day 21 Acelarin    | Illumina F2    | Illumina R3    |
| 8  | Replicate 2: Baseline           | Illumina F4    | Illumina R4    |
| 9  | Replicate 2: Day 14 Control     | Illumina F3    | Illumina R1    |
| 10 | Replicate 2: Day 14 Gemcitabine | Illumina F3    | Illumina R2    |
| 11 | Replicate 2: Day 14 Acelarin    | Illumina F3    | Illumina R3    |
| 12 | Replicate 2: Day 21 Control     | Illumina F3    | Illumina R4    |
| 13 | Replicate 2: Day 14 Gemcitabine | Illumina F4    | Illumina R1    |
| 14 | Replicate 2: Day 14 Acelarin    | Illumina F4    | Illumina R2    |

| PCR#1 Conditions     |      |         |           |
|----------------------|------|---------|-----------|
| Initial denaturation | 95°C | 2 min   | 1 cycle   |
| Denaturation         | 95°C | 10-20 s | 24 cycles |
| Annealing            | 60°C | 20s     |           |
| Elongation           | 72°C | 30s     | 1 cycle   |
| Final extension      | 72°C | 3 min   |           |
|                      | END  |         |           |

| PCR#2 Conditions     |      |       |           |
|----------------------|------|-------|-----------|
| Initial denaturation | 95°C | 2 min | 1 cycle   |
| Denaturation         | 95°C | 15 s  | 18 cycles |
| Annealing            | 50°C | 20s   |           |
| Elongation           | 72°C | 30s   | 1 cycle   |
| Final extension      | 72°C | 3 min |           |
|                      | END  |       |           |

Table S2: PCR primers and conditions

| Characteristics               | Number of patients | Per cent % |
|-------------------------------|--------------------|------------|
| <b>Gender</b>                 | 85                 | 100        |
| Male                          | 46                 | 54         |
| Female                        | 39                 | 46         |
| <b>Age (years)</b>            |                    |            |
| Median                        | 66                 | -          |
| Range                         | 43 - 84            | -          |
| <b>Pathologic stage</b>       |                    |            |
| T1                            | 3                  | 3.5        |
| T2                            | 6                  | 7          |
| T3                            | 74                 | 87         |
| T4                            | 2                  | 2.5        |
| N0                            | 15                 | 17.5       |
| N1                            | 68                 | 80         |
| NK                            | 2                  | 2.5        |
| MX                            | 31                 | 36.5       |
| M1                            | 2                  | 2.5        |
| NK                            | 52                 | 61         |
| <b>Tumour differentiation</b> |                    |            |
| Moderate                      | 36                 | 42.5       |
| moderate-poor                 | 11                 | 13         |
| Poor                          | 28                 | 33         |
| well                          | 10                 | 11.5       |
| <b>Treatment</b>              |                    |            |
| No chemotherapy               | 19                 | 22.5       |
| Gemcitabine                   | 24                 | 28         |
| Chemotherapy                  | 14                 | 16.5       |
| Not known                     | 28                 | 33         |

Table S3: TMA details of pancreatic cancer cohort

| Category          | Subcategory                    | Total collective (%)   |
|-------------------|--------------------------------|------------------------|
| Sex               | Female                         | 27 (72.97)             |
|                   | Male                           | 10 (27.03)             |
| Age               |                                | 31 – 83<br>median = 56 |
| Tumour type       | Ovary                          | 10 (27.03)             |
|                   | Colon                          | 6 (16.22)              |
|                   | Oesophageal                    | 3 (8.11)               |
|                   | Breast                         | 3 (8.11)               |
|                   | Lung                           | 2 (5.4)                |
|                   | Endometrium                    | 2 (5.4)                |
|                   | Pancreas                       | 2 (5.4)                |
|                   | Biliary                        | 2 (5.4)                |
|                   | Mesothelioma                   | 2 (5.4)                |
|                   | Uterine carcinoma              | 1 (2.7)                |
|                   | Osteosarcoma                   | 1 (2.7)                |
|                   | Cervix                         | 1 (2.7)                |
|                   | Adrenal                        | 1 (2.7)                |
|                   | Anal                           | 1 (2.7)                |
| Prior gemcitabine | Yes                            | 14 (37.84)             |
|                   | No                             | 23 (62.16)             |
| RECIST            | Partial response (unconfirmed) | 2 (5.4)                |
|                   | Stable disease                 | 25 (67.57)             |
|                   | Progressive disease            | 10 (27.03)             |

Table S4: pan-cancer phase I cohort details

**Uncropped gel blots:**

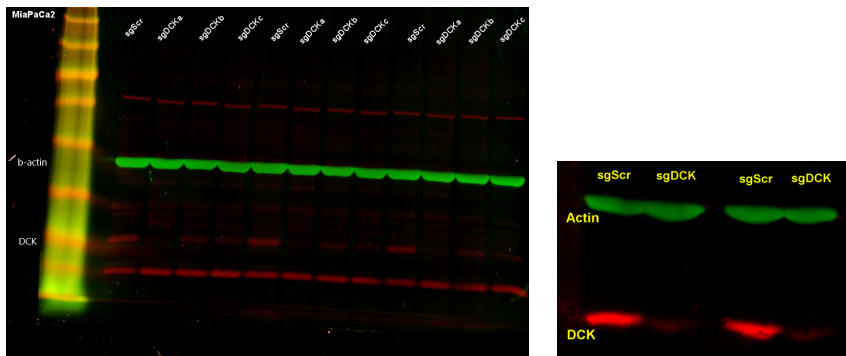

Blots from Fig. 3.

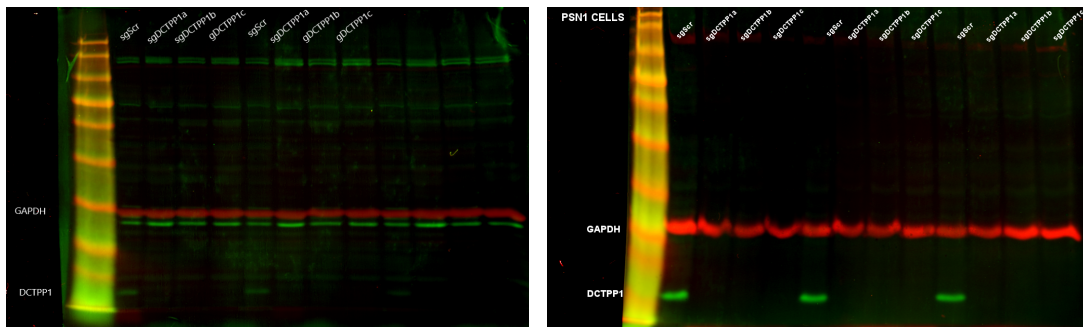

Blots from Fig. 4.

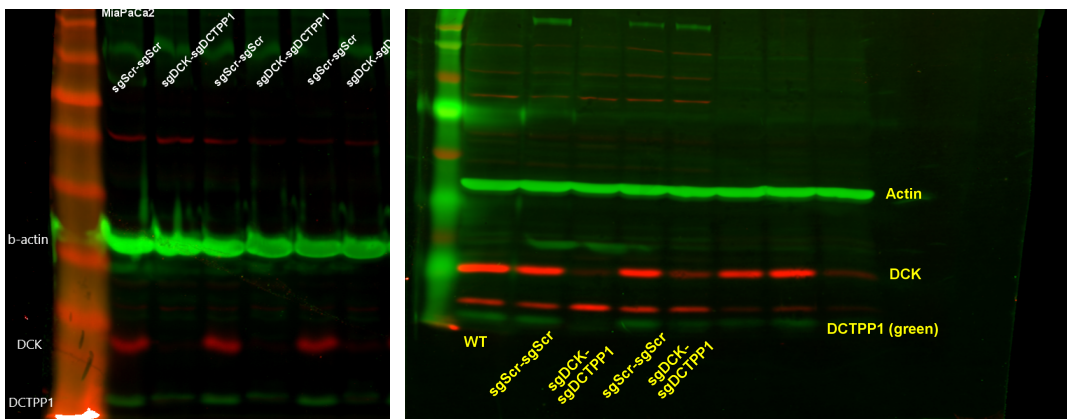

Blots from Fig. 5.
